# Supplementary material
Source: publisher figshare collection journal article supplement (https://karger.figshare.com/articles/dataset/_/5097142)
Supplement: Supplementary file 1 [file 1]

**Original Article**

---

# Weight Bias: A Systematic Review of Characteristics and Psychometric Properties of Self-Report Questionnaires

Emilie Lacroix<sup>a</sup> Angela Alberga<sup>b</sup> Shelly Russell-Mathew<sup>b</sup>  
Lindsay McLaren<sup>c</sup> Kristin von Ranson<sup>a</sup>

<sup>a</sup>Department of Psychology, University of Calgary, Calgary, AL, Canada; <sup>b</sup>Werklund School of Education, University of Calgary, Calgary, AL, Canada; <sup>c</sup>Department of Community Health Sciences, University of Calgary, Calgary, AL, Canada

## Supplemental Material

## Appendix A:

Detailed MEDLINE search strategy, in accordance with PRISMA guidelines

---

| # | Search |
|---|--------|
|---|--------|

---

1. weight bias\*.MP.
2. weight stigma\*.MP.
3. weight related stigma\*.MP.
4. weight discrimination.MP.
5. weight stereotyp\*.MP.
6. weight belief\*.MP.
7. weight phobia.MP.
8. weightism.MP.
9. fat bias\*.MP.
10. fat stigma\*.MP.
11. fat discrimination.MP.
12. fat stereotyp\*.MP.
13. fat belief\*.MP.
14. fat attitude\*.MP.
15. weight attitude\*.MP.
16. weight prejudice\*.MP.
17. fat prejudice\*.MP.

18. fat phobia.MP.
19. fatism.MP.
20. anti-fat bias\*.MP.
21. anti-fat stigma\*.MP.
22. anti-fat discrimination.MP.
23. anti-fat stereotyp\*.MP.
24. anti-fat belief\*.MP.
25. anti-fat attitude\*.MP.
26. anti-fat prejudice\*.MP.
27. obesity bias\*.MP.
28. obesity stigma\*.MP.
29. obesity related stigma\*.MP.
30. obesity discrimination.MP.
31. obesity stereotyp\*.MP.
32. obesity belief\*.MP.
33. obesity attitude\*.MP.
34. obesity prejudice\*.MP.
35. body size stigma\*.MP.
36. or/1-35
37. limit 36 to english

### 38. remove duplicates from 37

---

*Note.* A truncation symbol (\*) at the end of a word retrieves variations of the end of the word. For example, “bias\*” would retrieve publications including the words “bias,” “biases,” and “biased.”

MP stands for multi-purpose. In Ovid databases, .MP searches examine the following fields: Title, Original Title, Abstract, Subject Heading, Name of Substance, and Registry Word.
